# Supplementary material
Source: MDPI journal article supplement (https://www.mdpi.com/2673-7248/2/4/36)
Supplement: s1 [file s1 › textiles-2008053-supplementary.pdf]

## Liquid CO<sub>2</sub> All samples vs Conventional Wash

Average of All 40 samples for liquid CO<sub>2</sub> taken, average of all 5 samples for conventional wash

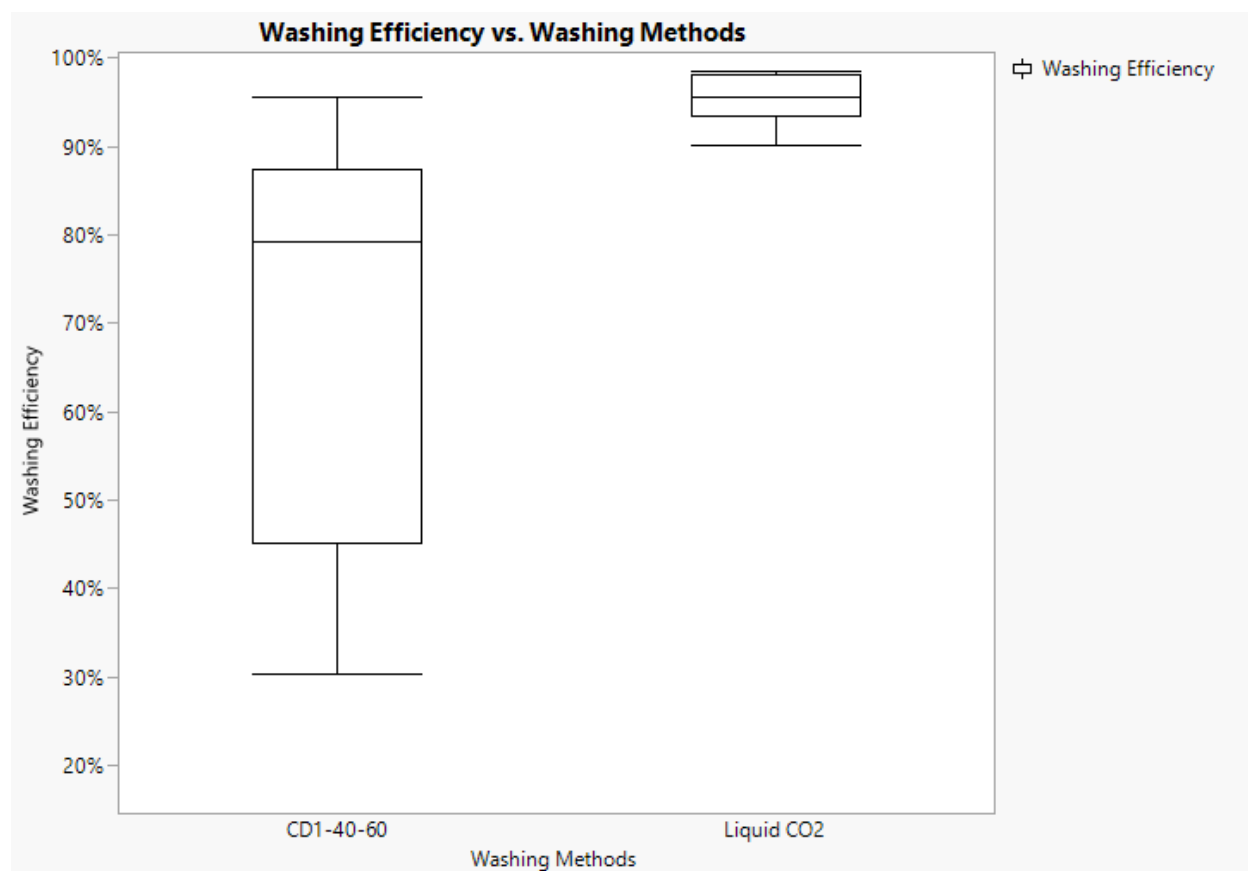

Figure S1: Box-plot of average washing efficiencies of all compounds for all samples

### t Test

Liquid CO<sub>2</sub>-Conventional Wash

Assuming unequal variances

|              |          |           |          |
|--------------|----------|-----------|----------|
| Difference   | 0.277433 | t Ratio   | 3.44543  |
| Std Err Dif  | 0.080522 | DF        | 8.226654 |
| Upper CL Dif | 0.462231 | Prob >  t | 0.0084*  |
| Lower CL Dif | 0.092636 | Prob > t  | 0.0042*  |
| Confidence   | 0.95     | Prob < t  | 0.9958   |

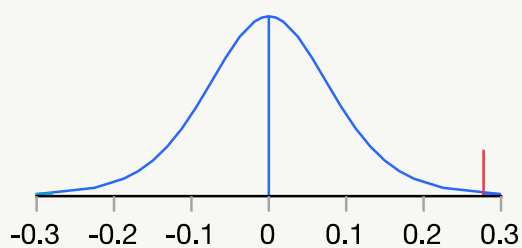

Figure S2: t-Test analysis (All samples)

Data Analysis

Conventional Wash

| Goodness-of-Fit Test |           |                   |
|----------------------|-----------|-------------------|
|                      | W         | Prob<W            |
| Shapiro-Wilk         | 0.9042853 | 0.2779            |
|                      | A2        | Simulated p-Value |
| Anderson-Darling     | 0.3968383 | 0.3076            |

Liquid CO<sub>2</sub>

| Goodness-of-Fit Test |           |                   |
|----------------------|-----------|-------------------|
|                      | W         | Prob<W            |
| Shapiro-Wilk         | 0.9235319 | 0.4223            |
|                      | A2        | Simulated p-Value |
| Anderson-Darling     | 0.3036233 | 0.5416            |

Figure S3: Normality test when all samples are considered (Left: Conventional washing, Right: liquid CO2 washing)

Equal Number of Samples

5 samples randomly chosen from set of 40 samples for liquid CO<sub>2</sub>, data for conventional wash is kept same

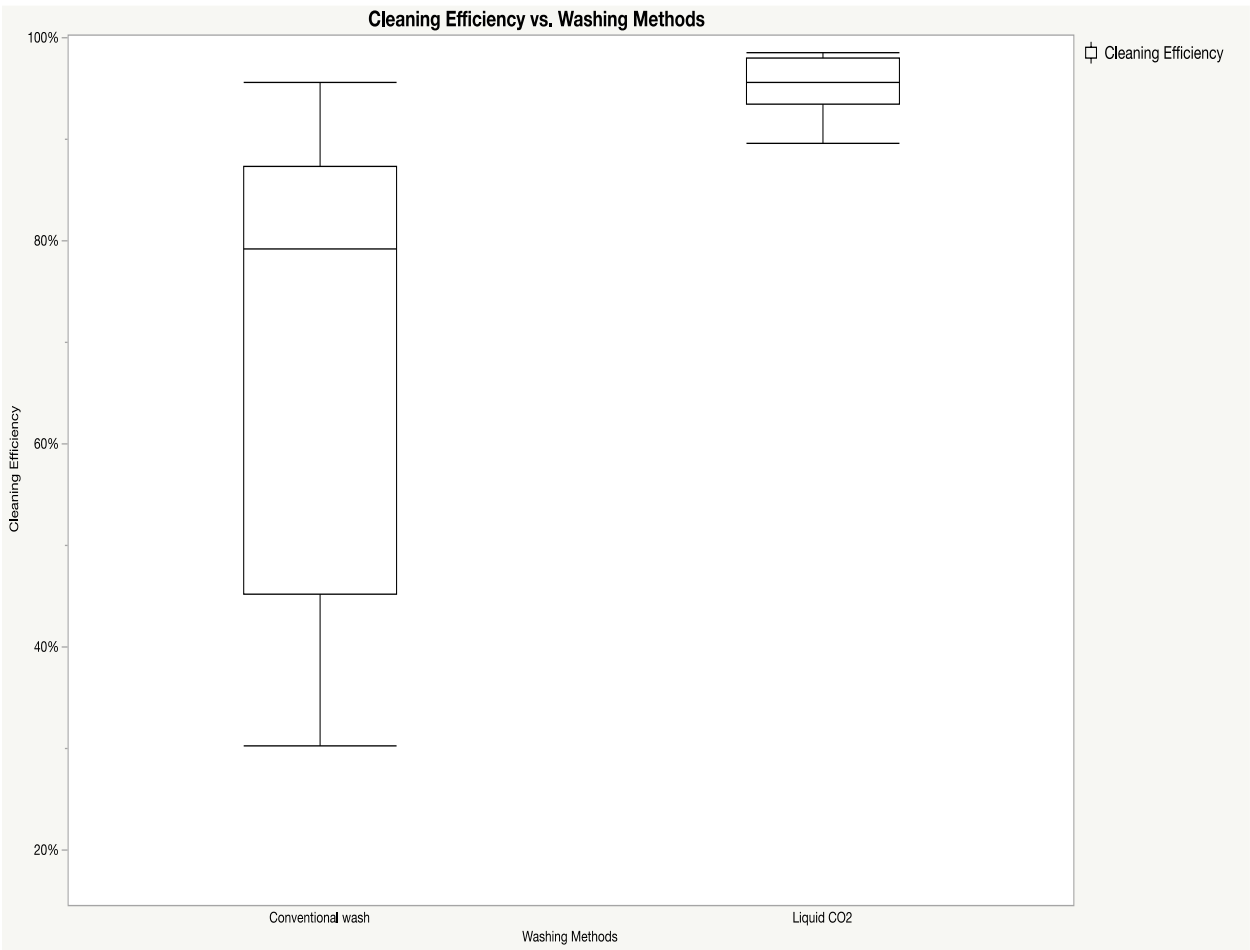

Figure S4: Box-Plot of average washing efficiencies of all compounds (when equal number of samples are considered)

Data Analysis

Conventional Wash

| Goodness-of-Fit Test |           |                   |
|----------------------|-----------|-------------------|
|                      | W         | Prob<W            |
| Shapiro-Wilk         | 0.9042853 | 0.2779            |
|                      | A2        | Simulated p-Value |
| Anderson-Darling     | 0.3968383 | 0.3144            |

Liquid CO<sub>2</sub>

| Goodness-of-Fit Test |           |                   |
|----------------------|-----------|-------------------|
|                      | W         | Prob<W            |
| Shapiro-Wilk         | 0.9284053 | 0.4663            |
|                      | A2        | Simulated p-Value |
| Anderson-Darling     | 0.2811541 | 0.5988            |

Figure S5:Normality test for equal number of samples (Left: Conventional washing, Right: liquid CO<sub>2</sub> washing)

T-test

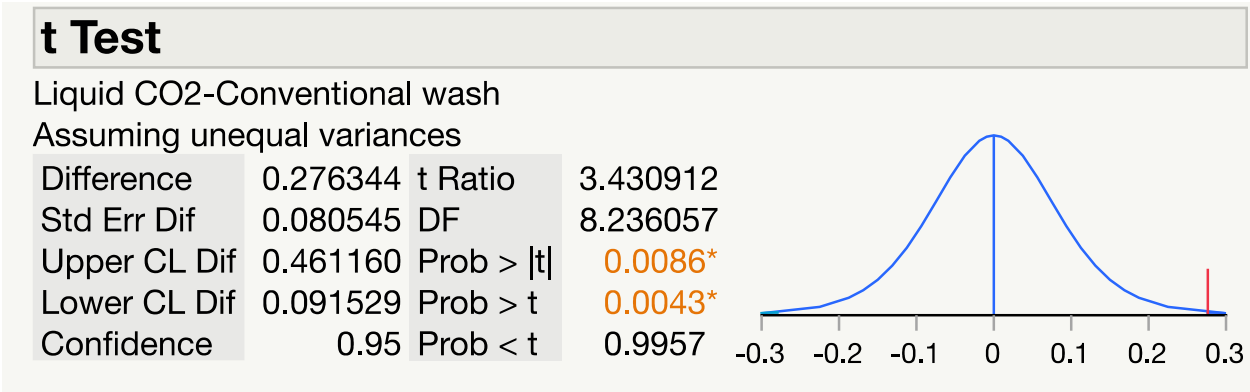

Figure S6:t-Test analysis (Equal number of samples)
